# Supplementary material
Source: Royal Society of Chemistry journal article supplement (doi:10.1039/d6fo01450j)
Supplement: d6fo01450j1.pdf [file d6fo01450j1.pdf]

## Supplementary Materials

**Table S1. Functional annotation of antimicrobial resistance genes**

| No. | Name                          | Drug_Class                                                                                                                                                                   | pident |
|-----|-------------------------------|------------------------------------------------------------------------------------------------------------------------------------------------------------------------------|--------|
| 1   | LptD                          | aminocoumarin antibiotic; peptide antibiotic; rifamycin antibiotic                                                                                                           | 100    |
| 2   | oqxA                          | diaminopyrimidine antibiotic; fluoroquinolone antibiotic;<br>glycylcycline; nitrofurantoin antibiotic; tetracycline antibiotic                                               | 100    |
| 3   | tet(D)                        | tetracycline antibiotic                                                                                                                                                      | 100    |
| 4   | SHV-1                         | carbapenem; cephalosporin; penam                                                                                                                                             | 100    |
| 5   | SHV-11                        | carbapenem; cephalosporin; penam                                                                                                                                             | 100    |
| 6   | sul1                          | sulfonamide antibiotic                                                                                                                                                       | 100    |
| 7   | sul2                          | sulfonamide antibiotic                                                                                                                                                       | 100    |
| 8   | dfrA12                        | diaminopyrimidine antibiotic                                                                                                                                                 | 100    |
| 9   | qacEdelta1                    | disinfecting agents and antiseptics                                                                                                                                          | 100    |
| 10  | Klebsiella pneumoniae<br>KpnF | aminoglycoside antibiotic; cephalosporin; disinfecting agents and<br>antiseptics; macrolide antibiotic; peptide antibiotic; rifamycin<br>antibiotic; tetracycline antibiotic | 100    |
| 11  | Klebsiella pneumoniae<br>KpnG | aminoglycoside antibiotic; carbapenem; cephalosporin;<br>fluoroquinolone antibiotic; macrolide antibiotic; penam; penem;<br>peptide antibiotic                               | 99.7   |
| 12  | OmpA                          | peptide antibiotic                                                                                                                                                           | 99.7   |
| 13  | oqxB                          | diaminopyrimidine antibiotic; fluoroquinolone antibiotic;<br>glycylcycline; nitrofurantoin antibiotic; tetracycline antibiotic                                               | 99.5   |
| 14  | eptB                          | peptide antibiotic                                                                                                                                                           | 99.5   |
| 15  | Klebsiella                    | aminoglycoside antibiotic; cephalosporin; disinfecting agents and                                                                                                            | 99.2   |

---

|    |                       |                                                                                                                                                                                                                    |      |
|----|-----------------------|--------------------------------------------------------------------------------------------------------------------------------------------------------------------------------------------------------------------|------|
|    | pneumoniae            | antiseptics; macrolide antibiotic; peptide antibiotic; rifamycin                                                                                                                                                   |      |
|    | KpnE                  | antibiotic; tetracycline antibiotic                                                                                                                                                                                |      |
| 16 | CRP                   | fluoroquinolone antibiotic; macrolide antibiotic; penam                                                                                                                                                            | 99   |
| 17 | ArnT                  | peptide antibiotic                                                                                                                                                                                                 | 98.9 |
| 18 | Klebsiella pneumoniae | carbapenem; cephalosporin; cephamycin; monobactam; penam; penem                                                                                                                                                    | 98.9 |
|    | OmpK37                |                                                                                                                                                                                                                    |      |
| 19 | fosA5                 | aminoglycoside antibiotic; fluoroquinolone antibiotic; phosphonic acid antibiotic                                                                                                                                  | 98.6 |
| 20 | Klebsiella pneumoniae | cephalosporin; disinfecting agents and antiseptics; fluoroquinolone antibiotic; glycylicline; penam; phenicol antibiotic; rifamycin                                                                                | 95.2 |
|    | acrA                  | antibiotic; tetracycline antibiotic                                                                                                                                                                                |      |
| 21 | cpxA                  | aminocoumarin antibiotic; aminoglycoside antibiotic                                                                                                                                                                | 93.7 |
| 22 | emrB                  | fluoroquinolone antibiotic                                                                                                                                                                                         | 93.4 |
| 23 | marA                  | carbapenem; cephalosporin; cephamycin; disinfecting agents and antiseptics; fluoroquinolone antibiotic; glycylicline; monobactam; penam; penem; phenicol antibiotic; rifamycin antibiotic; tetracycline antibiotic | 92.7 |
| 24 | emrR                  | fluoroquinolone antibiotic                                                                                                                                                                                         | 92.6 |
| 25 | baeR                  | aminocoumarin antibiotic; aminoglycoside antibiotic                                                                                                                                                                | 92.1 |
| 26 | ramA                  | carbapenem; cephalosporin; cephamycin; disinfecting agents and antiseptics; fluoroquinolone antibiotic; glycylicline; monobactam; penam; penem; phenicol antibiotic; rifamycin antibiotic; tetracycline antibiotic | 92   |
| 27 | msbA                  | nitroimidazole antibiotic                                                                                                                                                                                          | 91.9 |

---

|    |      |                                                                     |      |
|----|------|---------------------------------------------------------------------|------|
| 28 |      | cephalosporin; disinfecting agents and antiseptics; fluoroquinolone |      |
|    | acrB | antibiotic; glycylycyline; penam; phenicol antibiotic; rifamycin    | 91.5 |
|    |      | antibiotic; tetracycline antibiotic                                 |      |
| 29 | mdtC | aminocoumarin antibiotic                                            | 91.3 |
| 30 | acrD | aminoglycoside antibiotic                                           | 91.2 |
| 31 | mdtB | aminocoumarin antibiotic                                            | 90   |

**Table S2. Annotation of pathogen-host interactions (PHI)**

| No. | GeneName          | Pathogen_Disease | Hostspecies                                 | pident |
|-----|-------------------|------------------|---------------------------------------------|--------|
| 1   | Acrb              | pneumonia        | Caenorhabditis elegans (related: roundworm) | 100    |
| 2   | Fepa (vk055_1934) | pneumonia        | Mus musculus (related: house mouse)         | 100    |
| 3   | Ente (vk055_1924) | pneumonia        | Mus musculus (related: house mouse)         | 100    |
| 4   | Leuc              | pneumonia        | Mus musculus (related: house mouse)         | 100    |

|    |                   |                                                            |                                                 |     |
|----|-------------------|------------------------------------------------------------|-------------------------------------------------|-----|
| 5  | Prov              | pneumonia                                                  | Mus musculus (related: house mouse)             | 100 |
| 6  | Entc (vk055_1925) | pneumonia                                                  | Mus musculus (related: house mouse)             | 100 |
| 7  | Ompk35            | pneumonia                                                  | Mus musculus (related: house mouse)             | 100 |
| 8  | Leub              | pneumonia                                                  | Mus musculus (related: house mouse)             | 100 |
| 9  | Yhbu              | pneumonia                                                  | Mus musculus (related: house mouse)             | 100 |
| 10 | Lpx12 (bn49_1538) | pneumonia                                                  | Galleria mellonella (related: Greater wax moth) | 100 |
| 11 | Lpxo              | pneumonia                                                  | Galleria mellonella (related: Greater wax moth) | 100 |
| 12 | Fepb (vk055_1926) | pneumonia                                                  | Mus musculus (related: house mouse)             | 100 |
| 13 | Fepd (vk055_1928) | pneumonia                                                  | Mus musculus (related: house mouse)             | 100 |
| 14 | Fepg (vk055_1929) | pneumonia                                                  | Mus musculus (related: house mouse)             | 100 |
| 15 | Fimh              | pneumonia                                                  | Mus musculus (related: house mouse)             | 100 |
| 16 | Fepc (vk055_1930) | pneumonia                                                  | Mus musculus (related: house mouse)             | 100 |
| 17 | Ycge              | pneumonia                                                  | Mus musculus (related: house mouse)             | 100 |
| 18 | Gntr              | pneumonia                                                  | Mus musculus (related: house mouse)             | 100 |
| 19 | Fimc              | pneumonia                                                  | Mus musculus (related: house mouse)             | 100 |
| 20 | Deda              | pneumonia                                                  | Mus musculus (related: house mouse)             | 100 |
| 21 | Crp               | pneumonia                                                  | Mus musculus (related: house mouse)             | 100 |
| 22 | Leud              | pneumonia                                                  | Mus musculus (related: house mouse)             | 100 |
| 23 | Rcsb              | pneumonia                                                  | Galleria mellonella (related: greater wax moth) | 100 |
|    |                   | urinary tract                                              |                                                 |     |
| 24 | Maga              | infection; nosocomial<br>pneumonia;<br>abdominal infection | Mus musculus (related: house mouse)             | 100 |
| 25 | Fima              | pneumonia                                                  | Mus musculus (related: house mouse)             | 100 |
| 26 | Fimi              | pneumonia                                                  | Mus musculus (related: house mouse)             | 100 |

---

|    |                            |           |                                                 |      |
|----|----------------------------|-----------|-------------------------------------------------|------|
| 27 | Fimf                       | pneumonia | Mus musculus (related: house mouse)             | 100  |
| 28 | Yfir                       | pneumonia | Caenorhabditis elegans (related: roundworm)     | 100  |
| 29 | Hns                        | pneumonia | Mus musculus (related: house mouse)             | 100  |
| 30 | Rama (vk055_1983)          | pneumonia | Mus musculus (related: house mouse)             | 100  |
| 31 | Arne                       | pneumonia | Galleria mellonella (related: Greater wax moth) | 100  |
| 32 | Mdtj                       | pneumonia | Mus musculus (related: house mouse)             | 100  |
| 33 | Ihfa                       | pneumonia | Homo sapiens (related: human)                   | 100  |
| 34 | Ihfb                       | pneumonia | Homo sapiens (related: human)                   | 100  |
| 35 | Arna                       | pneumonia | Galleria mellonella (related: Greater wax moth) | 99.8 |
| 36 | Yfib                       | pneumonia | Caenorhabditis elegans (related: roundworm)     | 99.8 |
| 37 | Arnb                       | pneumonia | Galleria mellonella (related: Greater wax moth) | 99.7 |
| 38 | Oqxa                       | pneumonia | Caenorhabditis elegans (related: roundworm)     | 99.7 |
| 39 | Arc                        | pneumonia | Galleria mellonella (related: Greater wax moth) | 99.7 |
| 40 | Oqxb                       | pneumonia | Caenorhabditis elegans (related: roundworm)     | 99.6 |
| 41 | Fimd                       | pneumonia | Mus musculus (related: house mouse)             | 99.6 |
| 42 | Entb (vk055_1923);<br>Entb | pneumonia | Mus musculus (related: house mouse)             | 99.6 |
| 43 | Yaaa                       | pneumonia | Mus musculus (related: house mouse)             | 99.6 |
| 44 | Vk055_1980                 | pneumonia | Mus musculus (related: house mouse)             | 99.5 |
| 45 | Yfin                       | pneumonia | Caenorhabditis elegans (related: roundworm)     | 99.5 |
| 46 | Ybdk (vk055_1976)          | pneumonia | Mus musculus (related: house mouse)             | 99.5 |
| 47 | Mrka                       | pneumonia | Mus musculus (related: house mouse)             | 99.5 |
| 48 | Beti (vk055_1951)          | pneumonia | Mus musculus (related: house mouse)             | 99.5 |
| 49 | Vk055_1952                 | pneumonia | Mus musculus (related: house mouse)             | 99.4 |
| 50 | Vk055_1939                 | pneumonia | Mus musculus (related: house mouse)             | 99.4 |

---

---

|    |                   |           |                                                 |      |
|----|-------------------|-----------|-------------------------------------------------|------|
| 51 | Fimg              | pneumonia | Mus musculus (related: house mouse)             | 99.4 |
| 52 | Pgac              | pneumonia | Mus musculus (related: house mouse)             | 99.3 |
| 53 | Rara              | pneumonia | Caenorhabditis elegans (related: roundworm)     | 99.3 |
| 54 | Lpx11 (bn49_2155) | pneumonia | Galleria mellonella (related: Greater wax moth) | 99.3 |
| 55 | Ykfe (vk055_1949) | pneumonia | Mus musculus (related: house mouse)             | 99.3 |
| 56 | Leua              | pneumonia | Mus musculus (related: house mouse)             | 99.2 |
| 57 | Vk055_1961        | pneumonia | Mus musculus (related: house mouse)             | 99.2 |
| 58 | Arnt              | pneumonia | Galleria mellonella (related: Greater wax moth) | 99.1 |
| 59 | Fimk              | pneumonia | Mus musculus (related: house mouse)             | 99.1 |
| 60 | Ccma (vk055_1938) | pneumonia | Mus musculus (related: house mouse)             | 99.1 |
| 61 | Phoq              | pneumonia | Galleria mellonella (related: greater wax moth) | 98.8 |
| 62 | Enta (vk055_1922) | pneumonia | Mus musculus (related: house mouse)             | 98.8 |
| 63 | Pagp              | pneumonia | Galleria mellonella (related: Greater wax moth) | 98.8 |
| 64 | Vk055_1944        | pneumonia | Mus musculus (related: house mouse)             | 98.7 |
| 65 | Arnd              | pneumonia | Galleria mellonella (related: Greater wax moth) | 98.7 |
| 66 | Arnf              | pneumonia | Galleria mellonella (related: Greater wax moth) | 98.4 |
| 67 | Entf (vk055_1931) | pneumonia | Mus musculus (related: house mouse)             | 98.2 |
| 68 | Mdti              | pneumonia | Mus musculus (related: house mouse)             | 97.2 |
| 69 | Ompk36            | pneumonia | Galleria mellonella (related: greater wax moth) | 95.4 |
| 70 | Tonb              | pneumonia | Mus musculus (related: house mouse)             | 94.7 |
| 71 | Ompa2             | pneumonia | Galleria mellonella (related: greater wax moth) | 91   |

---

**Table S3. Annotation of virulence factors**

| <b>No.</b> | <b>VF_Gene</b> | <b>VF_Name</b>  | <b>VFcategory</b>              | <b>pident</b> |
|------------|----------------|-----------------|--------------------------------|---------------|
| 1          | hcp            | T6SS            | Effector delivery system       | 100           |
| 2          | vipA           | T6SS            | Effector delivery system       | 100           |
| 3          | entE           | Ent             | Nutritional / Metabolic factor | 100           |
| 4          | entS           | Ent             | Nutritional / Metabolic factor | 100           |
| 5          | fepD           | Ent             | Nutritional / Metabolic factor | 100           |
| 6          | fepG           | Ent             | Nutritional / Metabolic factor | 100           |
| 7          | fepC           | Ent             | Nutritional / Metabolic factor | 100           |
| 8          | fimD           | Type I fimbriae | Adherence                      | 100           |
| 9          | fimE           | Type I fimbriae | Adherence                      | 100           |
| 10         | fimI           | Type I fimbriae | Adherence                      | 100           |
| 11         | fimA           | Type I fimbriae | Adherence                      | 100           |
| 12         | ugd            | Capsule         | Immune modulation              | 100           |
| 13         | mrkD           | Type 3 fimbriae | Biofilm                        | 100           |
| 14         | mrkJ           | Type 3 fimbriae | Biofilm                        | 100           |
| 15         | mrkH           | Type 3 fimbriae | Biofilm                        | 100           |
| 16         | mrkF           | Type 3 fimbriae | Biofilm                        | 100           |

---

|    |             |                 |                                                |      |
|----|-------------|-----------------|------------------------------------------------|------|
| 17 | mrkA        | Type 3 fimbriae | Biofilm                                        | 100  |
| 18 | KP1_RS17225 | LPS             | Immune modulation                              | 100  |
| 19 | rfbA        | LPS             | Immune modulation                              | 100  |
| 20 | rfbB        | LPS             | Immune modulation                              | 100  |
| 21 | acrB        | AcrAB           | Antimicrobial activity / Competitive advantage | 100  |
| 22 | acrA        | AcrAB           | Antimicrobial activity / Competitive advantage | 100  |
| 23 | rcsB        | RcsAB           | Regulation                                     | 100  |
| 24 | rcsA        | RcsAB           | Regulation                                     | 100  |
| 25 | mrkC        | Type 3 fimbriae | Biofilm                                        | 99.9 |
| 26 | iutA        | Aerobactin      | Nutritional / Metabolic factor                 | 99.9 |
| 27 | gndA        | Capsule         | Immune modulation                              | 99.8 |
| 28 | rfbK1       | Capsule         | Immune modulation                              | 99.8 |
| 29 | clpV        | T6SS            | Effector delivery system                       | 99.7 |
| 30 | tssG        | T6SS            | Effector delivery system                       | 99.7 |
| 31 | fepB        | Ent             | Nutritional / Metabolic factor                 | 99.7 |
| 32 | fimH        | Type I fimbriae | Adherence                                      | 99.7 |
| 33 | KP1_RS17230 | LPS             | Immune modulation                              | 99.7 |
| 34 | iroE        | Sal             | Nutritional / Metabolic factor                 | 99.7 |
| 35 | vasE        | T6SS            | Effector delivery system                       | 99.6 |
| 36 | dotU        | T6SS            | Effector delivery system                       | 99.6 |
| 37 | fepA        | Ent             | Nutritional / Metabolic factor                 | 99.6 |
| 38 | entB        | Ent             | Nutritional / Metabolic factor                 | 99.6 |
| 39 | mrkB        | Type 3 fimbriae | Biofilm                                        | 99.6 |
| 40 | entF        | Ent             | Nutritional / Metabolic factor                 | 99.5 |
| 41 | fimB        | Type I fimbriae | Adherence                                      | 99.5 |

---

---

|    |             |                 |                                |      |
|----|-------------|-----------------|--------------------------------|------|
| 42 | mrkI        | Type 3 fimbriae | Biofilm                        | 99.5 |
| 43 | icmF        | T6SS            | Effector delivery system       | 99.4 |
| 44 | vipB        | T6SS            | Effector delivery system       | 99.4 |
| 45 | sciN        | T6SS            | Effector delivery system       | 99.4 |
| 46 | fimG        | Type I fimbriae | Adherence                      | 99.4 |
| 47 | KP1_RS17280 | Capsule         | Immune modulation              | 99.4 |
| 48 | KP1_RS17240 | LPS             | Immune modulation              | 99.4 |
| 49 | entC        | Ent             | Nutritional / Metabolic factor | 99.2 |
| 50 | fimK        | Type I fimbriae | Adherence                      | 99.1 |
| 51 | fimC        | Type I fimbriae | Adherence                      | 99.1 |
| 52 | tssF        | T6SS            | Effector delivery system       | 99   |
| 53 | fes         | Ent             | Nutritional / Metabolic factor | 99   |
| 54 | KP1_RS17220 | LPS             | Immune modulation              | 99   |
| 55 | entA        | Ent             | Nutritional / Metabolic factor | 98.8 |
| 56 | impA        | T6SS            | Effector delivery system       | 98.7 |
| 57 | rfbD        | LPS             | Immune modulation              | 98.7 |
| 58 | gmd         | Capsule         | Immune modulation              | 98.4 |
| 59 | ompA        | T6SS            | Effector delivery system       | 97.7 |
| 60 | fimF        | Type I fimbriae | Adherence                      | 97.7 |
| 61 | wcaJ        | Capsule         | Immune modulation              | 95.9 |
| 62 | KP1_RS17355 | Capsule         | Immune modulation              | 95.7 |
| 63 | KP1_RS17305 | Capsule         | Immune modulation              | 94.7 |
| 64 | KP1_RS17345 | Capsule         | Immune modulation              | 93.3 |
| 65 | KP1_RS17340 | Capsule         | Immune modulation              | 92.6 |
| 66 | vgrG        | T6SS            | Effector delivery system       | 92.1 |

---

**Table S4. Genomic islands**

| GI_chrom | GI_ID | GI_Start | GI_End  | GI_Length |
|----------|-------|----------|---------|-----------|
| Chrom1   | GI_1  | 726832   | 753714  | 26883     |
| Chrom1   | GI_2  | 1064541  | 1078778 | 14238     |
| Chrom1   | GI_3  | 1139364  | 1147533 | 8170      |
| Chrom1   | GI_4  | 1210331  | 1225733 | 15403     |
| Chrom1   | GI_5  | 2068379  | 2116497 | 48119     |
| Chrom1   | GI_6  | 2895585  | 2910318 | 14734     |
| Chrom1   | GI_7  | 2936707  | 2961678 | 24972     |
| Chrom1   | GI_8  | 3845667  | 3853489 | 7823      |
| Chrom1   | GI_9  | 3884118  | 3927961 | 43844     |

**Table S5. Determination of the minimum inhibitory concentration (MIC) of PCP against KP.**

|        | PCP (mg/mL) |     |      |       |       |       |       |       |   |             |
|--------|-------------|-----|------|-------|-------|-------|-------|-------|---|-------------|
|        | 5           | 2.5 | 1.25 | 0.625 | 0.313 | 0.156 | 0.078 | 0.039 | 0 | Ceftriaxone |
| Result | +           | +   | +    | +     | +     | +     | +     | +     | + | -           |

Note: “+” indicates KP growth; “-” indicates KP growth inhibition.

## Supplementary Materials

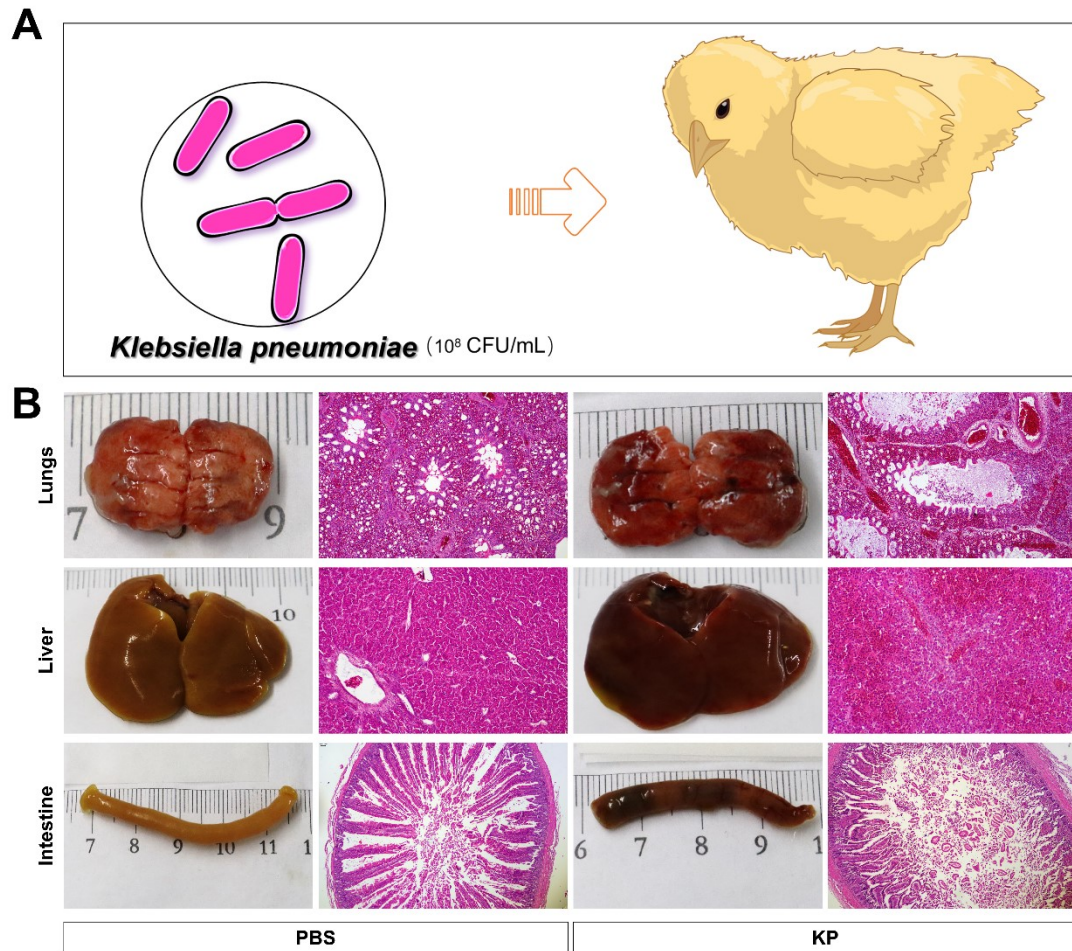

**Figure S1. Infection of chicks with KP.** (A) Schematic diagram of the experimental procedure; (B) Histological observation of visceral organs (lung, liver, and partial intestine).

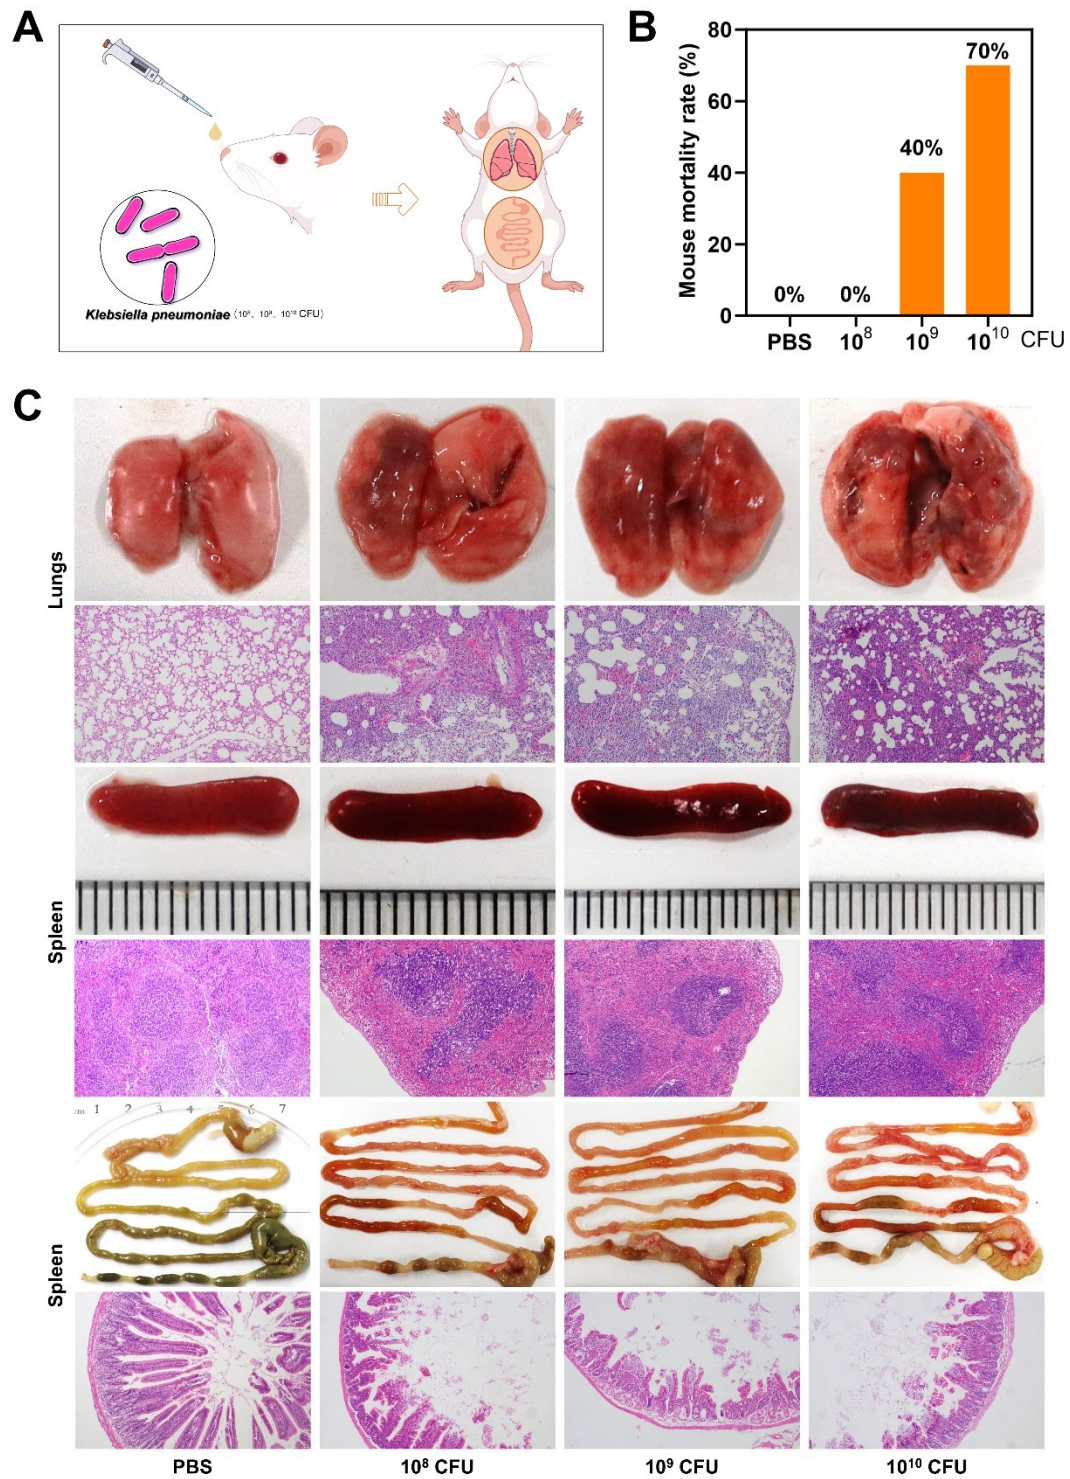

**Figure S2. Establishment of KP-induced ALI model.** A: Experimental flow chart. Mice were intranasally challenged with  $10^8$ ,  $10^9$ ,  $10^{10}$  CFU of KP, respectively. Tissues of lung, spleen, and intestine were collected 24 h post-challenge. B: Mortality rate; C: Gross pathology and histopathological changes of lungs, spleen, and intestines.

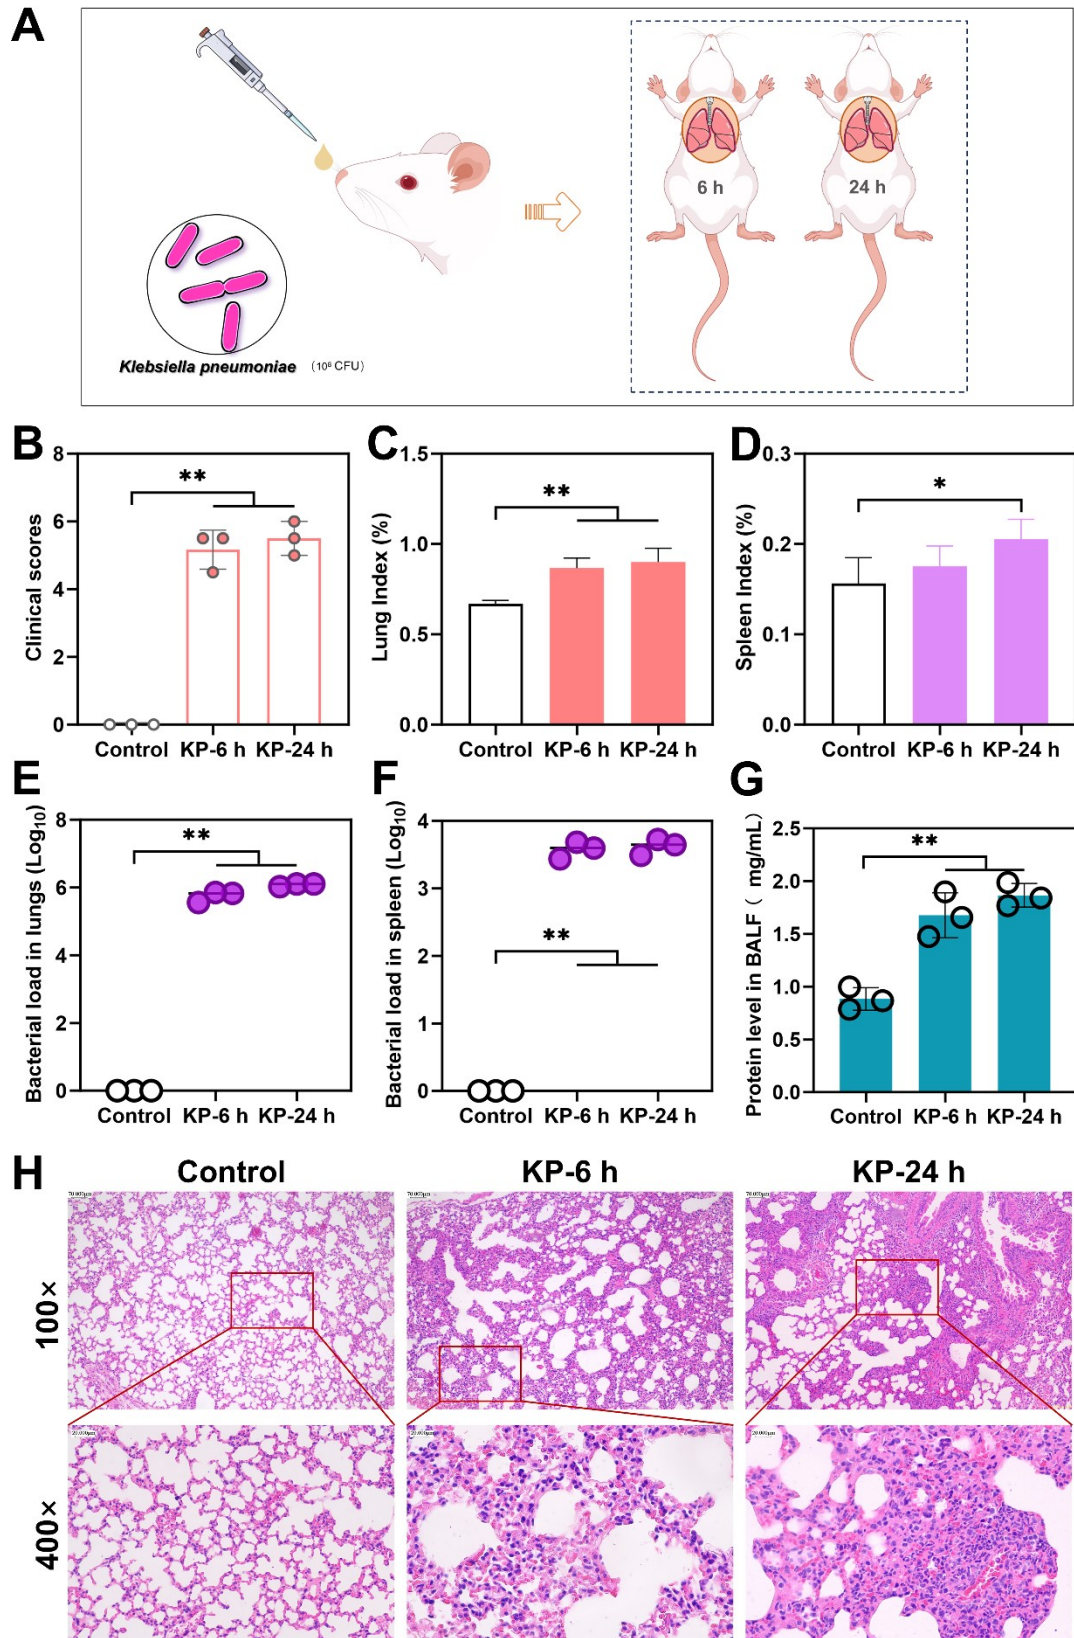

**Figure S3. Comparison of different time points post KP infection.** A: Experimental flow chart. Mice were intranasally challenged with  $10^8$  CFU of KP, and lungs, spleens,

and intestines were collected at 6 h and 24 h post-challenge. B: Lung index; C: Spleen index; D: Bacterial load in lung; E: Bacterial load in spleen; F: BALF protein level; G: Protein concentration in BALF; H: HE staining sections. Data were expressed as means  $\pm$  SD. \* $p < 0.05$ ; \*\* $p < 0.01$ .

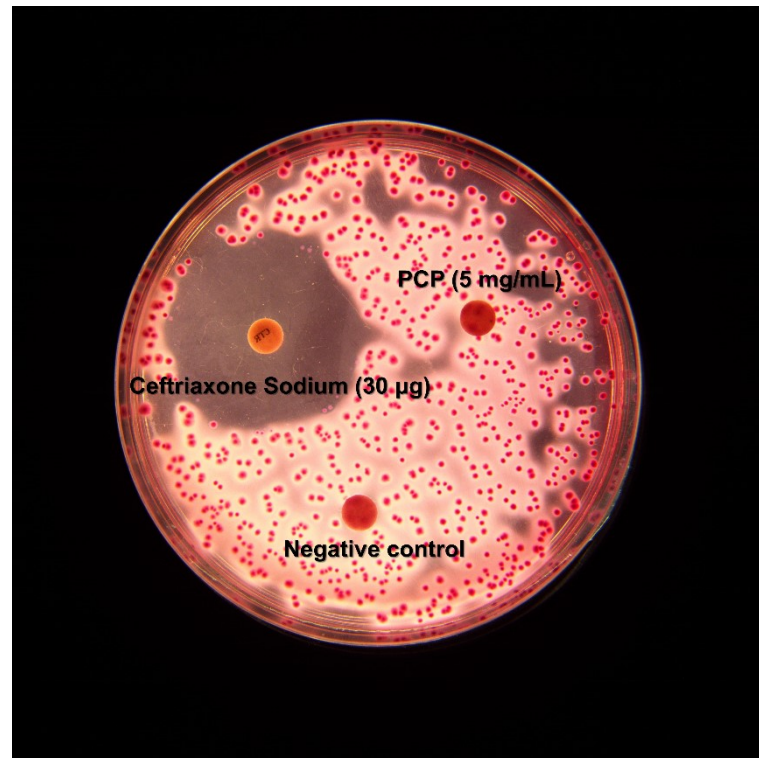

**Figure S4. Antibacterial activity of PCP in vitro.** The susceptibility disk test (K-B method) was performed to evaluate the inhibitory effect of PCP against KP in vitro. Filter paper disks impregnated with PCP (5 mg/mL), ceftriaxone sodium (positive control, 30  $\mu$ g), or sterile water (negative control) were placed on MacConkey agar plates inoculated with KP.
